# Supplementary material for: Fate and Occurrence of Polycyclic Aromatic Hydrocarbons and Their Derivatives in Water and Sediment from Songhua River, Northeast China
Source: MDPI journal article supplement (doi:10.3390/w13091196), 2021-04-26
Supplement: s1 [file s1]

## Supplementary Materials

# Fate and Occurrence of Polycyclic Aromatic Hydrocarbons and their Derivatives in Water and Sediment from Songhua River, Northeast China

Rashid Mohammed <sup>1</sup>, Zi-Feng Zhang <sup>1,2,3\*</sup>, Chao Jiang <sup>4</sup>, Ying-Hua Hu <sup>4</sup>, Li-Yan Liu <sup>1,2,3</sup>, Wan-Li Ma <sup>1,2,3</sup>, Wei-Wei Song <sup>1,2,3</sup>, Anatoly Nikolaev <sup>5</sup> and Yi-Fan Li <sup>1,2,3,6,\*</sup>

### Chemicals and Reagents

All the solvents utilized in the experiments were high-performance liquid chromatography (HPLC)-grade quality. Dichloromethane (DCM), methanol (MeOH) and toluene were purchased from Fisher Scientific (Fair lawn, New Jersey, USA). Pure (>18 MΩ-cm R) reagent water was prepared by a Milli-Q system (Millipore, Billerica, MA).

Each of the PAHs mixture standards was purchased from AccuStandard (New Haven, CT, USA). The 98% pure deuterium-labeled 16 PAHs mixture standards was purchased from AccuStandard. 2-Methylnaphthalene-d10, 1-Methylnaphthalene-d10, 9-Methylanthracene-d12, 1-Nitronaphthalene-d7 and 9-Nitronanthracene-d9 were purchased from Chiron (Norway).

**Table S1.** Sampling sites information selected to collect sediment and water samples.

| Sediment and water sites | Descriptions                        | Longitude | Latitude | Sizes            | Population (×10 <sup>4</sup> ) | Locations                                     |
|--------------------------|-------------------------------------|-----------|----------|------------------|--------------------------------|-----------------------------------------------|
| S1 and W1                | the downstream of Jilin City        | 126       | 44.0     | Medium city      | 4302012                        | Jilin (Second Songhua River)                  |
| S2 and W2                | the downstream of Songyuan City     | 124       | 45.1     | Medium city      | 2782015                        | Jilin (Second Songhua River)                  |
| S3 and W3                | the downstream of Da'an City        | 124       | 45.5     | Small city       | 432013                         | Jilin (Nen River)                             |
| S4 and W4                | the downstream of Zhaoyuan County   | 124       | 45.4     | Small city       | 47.52013                       | Heilongjiang (Songhua River)                  |
| S5 and W5                | the upstream of Qiqihaer City       | 124       | 47.5     | Medium city      | 5712010                        | Heilongjiang (Nen River)                      |
| S6 and W6                | the downstream of Harbin City       | 127       | 46       | Big city         | 9612015                        | Heilongjiang (Songhua River)                  |
| S7 and W7                | the downstream of Tonghe County     | 128       | 45.8     | Small city       | 23.92009                       | Heilongjiang (Songhua River)                  |
| S8 and W8                | the downstream of Yilan County      | 129       | 46.3     | Small city       | 392015                         | Heilongjiang (Songhua River)                  |
| S9 and W9                | the upstream of Jiamusi City        | 130       | 46.8     | Medium city      | 2552010                        | Heilongjiang (Songhua River)                  |
| S10 and W10              | the middle of Tangwang River        | 129       | 46.6     | Small city       | 272015                         | Heilongjiang (Songhua River)                  |
| S11 and W11              | the middle of Mudan River           | 129       | 45.6     | length is 1705,  | -                              | the second largest tributary of Songhua River |
| S12 and W12              | the upper stream of Mudanjiang City | 129       | 44.6     | Medium city      | 2782012                        | Heilongjiang (Mudan River)                    |
| S13 and W13              | The middle of Lalin River           | 126       | 45.1     | length is 448 km | -                              | feeds into Songhua River                      |

|             |                           |     |      |                  |   |                                            |
|-------------|---------------------------|-----|------|------------------|---|--------------------------------------------|
| S14 and W14 | The end of Heilong River  | 126 | 45.9 | length is 523 km | - | Heilongjiang (Heilong River)               |
| S15 and W15 | The middle of Hulan River | 126 | 46.2 | length is 523 km | - | feeds into Songhua River at Hulan District |
| S16 and W16 | Ma Yan River              | 128 | 45.8 | length is 341 km | - | tributary in the right of Song-hua River   |

**Table S2.** GC-MS/MS detection parameters of target PAHs, Me-PAHs and NPAHs including the optimized.

| Analytes                   | Retention Time<br>(min) | Transition 1<br>(m/z) | CE 1<br>(eV) | Transition 2<br>(m/z) | CE 2<br>(eV) |
|----------------------------|-------------------------|-----------------------|--------------|-----------------------|--------------|
| Naphthalene                | 5.077                   | 128→102               | 20           | 128→127               | 20           |
| Naphthalene-D8             | 5.020                   | 136→108               | 10           | 136→84                | 15           |
| Acenaphthylene             | 7.142                   | 152→150               | 25           | 152→151               | 25           |
| Acenaphthylene-D8          | 7.098                   | 160→158               | 25           | 160→132               | 30           |
| Acenaphthene               | 7.399                   | 153→152               | 25           | 153→151               | 25           |
| Acenaphthene-D10           | 7.328                   | 162→160               | 30           | 162→158               | 30           |
| Fluorene                   | 8.213                   | 166→165               | 25           | 165→163               | 30           |
| Fluorene-D10               | 8.134                   | 176→174               | 20           | 176→172               | 40           |
| Phenanthrene               | 10.630                  | 178→176               | 25           | 178→152               | 25           |
| Phenanthrene-D10           | 10.508                  | 188→160               | 30           | 188→184               | 40           |
| Anthracene                 | 10.793                  | 178→176               | 25           | 178→152               | 25           |
| Fluoranthene               | 15.356                  | 202→200               | 35           | 202→201               | 25           |
| Fluoranthene-D10           | 15.261                  | 212→208               | 40           | 212→210               | 30           |
| Pyrene                     | 16.053                  | 202→200               | 35           | 202→201               | 25           |
| Pyrene-D10                 | 15.965                  | 212→208               | 40           | 212→210               | 40           |
| Benz(a)anthracene          | 19.670                  | 228→226               | 30           | 228→202               | 30           |
| Benz(a)anthracene-D12      | 19.589                  | 240→236               | 40           | 240→212               | 40           |
| Chrysene                   | 19.779                  | 228→226               | 30           | 228→202               | 30           |
| Chrysene-D12               | 19.681                  | 240→236               | 40           | 240→212               | 30           |
| Benzo[b]fluoranthene       | 22.325                  | 252→250               | 30           | 252→226               | 25           |
| Benzo[b]fluoranthene-D12   | 22.249                  | 264→260               | 40           | 264→236               | 40           |
| Benzo[k]fluoranthene       | 22.389                  | 252→250               | 30           | 252→226               | 25           |
| Benzo[k]Fluoranthene-D12   | 22.312                  | 264→260               | 40           | 264→236               | 40           |
| Benzo[a]pyrene             | 22.996                  | 252→250               | 30           | 252→226               | 25           |
| Benzop[a]pyrene-D12        | 22.921                  | 264→260               | 40           | 264→236               | 40           |
| Indeno[1,2,3-cd]pyrene     | 25.331                  | 276→274               | 45           | 276→272               | 50           |
| Indeno[1,2,3-cd]pyrene-D12 | 25.253                  | 288→284               | 40           | 288→286               | 40           |
| Dibenz(a,h)anthracene      | 25.410                  | 278→274               | 55           | 278→276               | 50           |
| Dibenzo[a,h]anthracene-D14 | 25.309                  | 292→288               | 40           | 292→290               | 30           |
| Benzo[g,h,i]perylene       | 25.914                  | 276→274               | 45           | 276→272               | 50           |
| Benzo[g,h,i]perylene-D12   | 25.820                  | 288→284               | 40           | 288→286               | 30           |
| <b>Me-PAHs</b>             |                         |                       |              |                       |              |
| 2-Methylnaphthalene        | 9.245                   | 141→115               | 20           | 142→141               | 20           |
| 2-Methylnaphthalene-d10    | 9.050                   | 150→122               | 30           | 152→122               | 35           |
| 1-Methylnaphthalene        | 9.548                   | 141→115               | 20           | 142→141               | 20           |
| 1-Methylnaphthalene-d10    | 9.354                   | 152→150               | 20           | 150→122               | 20           |
| 2,6-Dimethylnaphthalene    | 11.156                  | 156→141               | 20           | 156→115               | 40           |
| 2,7-Dimethylnaphthalene    | 11.165                  | 156→141               | 15           | 141→115               | 20           |
| 1,3-Dimethylnaphthalene    | 11.410                  | 141→115               | 20           | 156→141               | 20           |
| 1,6-Dimethylnaphthalene    | 11.459                  | 156→141               | 20           | 141→115               | 20           |
| 1,4-Dimethylnaphthalene    | 11.732                  | 141→115               | 20           | 156→141               | 20           |
| 1,5-Dimethylnaphthalene    | 11.783                  | 141→115               | 20           | 156→141               | 20           |
| 1,2-Dimethylnaphthalene    | 11.982                  | 141→115               | 25           | 156→141               | 15           |
| 2-Methylphenanthrene       | 19.414                  | 192→191               | 20           | 191→189               | 30           |
| 2-Methylanthracene         | 19.680                  | 192→191               | 20           | 192→189               | 40           |
| 1-Methylanthracene         | 19.964                  | 192→191               | 20           | 192→189               | 40           |

|                                  |        |         |    |         |    |
|----------------------------------|--------|---------|----|---------|----|
| 1-Methylphenanthrene             | 20.029 | 192→191 | 20 | 191→189 | 30 |
| 9-Methylanthracene               | 21.015 | 192→191 | 20 | 191→189 | 30 |
| 9-Methylanthracene-d12           | 20.753 | 204→202 | 25 | 202→198 | 30 |
| 3,6-Dimethylphenanthrene         | 22.588 | 206→191 | 20 | 206→189 | 45 |
| 2,3-Dimethylanthracene           | 25.113 | 206→191 | 20 | 206→189 | 45 |
| 9,10-Dimethylanthracene          | 27.022 | 206→191 | 20 | 191→189 | 30 |
| 9-Methyl-9-phenylfluorene        | 27.197 | 241→239 | 35 | 256→241 | 15 |
| 2-Methylfluoranthene             | 28.001 | 216→215 | 25 | 215→213 | 40 |
| 1-Methylpyrene                   | 29.192 | 216→215 | 25 | 215→189 | 30 |
| 1,2-Methylbenz[a]anthracene      | 31.975 | 242→241 | 20 | 242→239 | 50 |
| 7,9-Methylbenz[a]anthracene      | 32.038 | 242→241 | 20 | 242→239 | 45 |
| 4,6-Methylbenz[a]anthracene      | 32.100 | 242→241 | 20 | 242→239 | 45 |
| 3,5-Methylbenz[a]anthracene      | 32.218 | 242→241 | 20 | 242→239 | 50 |
| 10-Methylbenz[a]anthracene       | 32.453 | 242→241 | 20 | 242→239 | 45 |
| 5,8-Dimethylbenzo[c]phenanthrene | 32.751 | 256→241 | 20 | 256→239 | 50 |
| 6,8-Dimethylbenz[a]anthracene    | 32.848 | 256→239 | 45 | 256→241 | 20 |
| 3,9Dimethylbenz[a]anthracene     | 32.891 | 256→239 | 50 | 256→255 | 25 |
| 7,12-Dimethylbenz(a)anthracene   | 33.305 | 256→241 | 20 | 256→239 | 50 |
| 3-Methylcholanthrene             | 34.467 | 268→252 | 40 | 268→253 | 20 |
| 8,9-Methylbenzo[a]pyrene         | 34.512 | 266→265 | 20 | 266→263 | 50 |
| 7,10-Methylbenzo[a]pyrene        | 34.693 | 266→265 | 20 | 266→263 | 50 |
| 7,10-Dimethylbenzo[a]pyrene      | 35.722 | 280→265 | 20 | 280→264 | 35 |
| <b>NPAHs</b>                     |        |         |    |         |    |
| 1-Nitronaphthalene               | 14.293 | 127→77  | 15 | 173→115 | 20 |
| 1-Nitronaphthalene-D7            | 14.254 | 180→122 | 35 | 134→82  | 20 |
| 2-Nitronaphthalene               | 14.881 | 173→115 | 10 | 127→77  | 20 |
| 2-Nitrobiphenyl                  | 15.581 | 152→151 | 20 | 182→154 | 15 |
| 4-Nitrobiphenyl                  | 18.356 | 199→169 | 10 | 199→141 | 20 |
| 5-Nitroacenaphthene              | 22.659 | 199→169 | 10 | 152→151 | 25 |
| 2,2'-Dinitrobiphenyl             | 24.842 | 198→115 | 20 | 168→139 | 25 |
| 9-Nitroanthracene                | 27.170 | 223→193 | 15 | 223→165 | 35 |
| 9-Nitroanthracene-D9             | 27.121 | 232→174 | 35 | 232→202 | 15 |
| 9-Nitrophenanthrene              | 28.492 | 177→176 | 15 | 223→165 | 25 |
| 2-Nitrodibenzothiophene          | 28.882 | 183→139 | 20 | 229→183 | 20 |
| 3-Nitrophenanthrene              | 29.133 | 223→165 | 15 | 223→177 | 20 |
| 2-Nitroanthracene                | 29.699 | 223→177 | 20 | 177→176 | 15 |
| 9,10-Dinitroanthracene           | 30.138 | 268→55  | 10 | 176→150 | 20 |

**Table S3.** Concentrations of target compounds in water (ng/L) and sediment (ng/g) samples from the Songhua River, North China.

| PAHs           | Water (ng/L) |            |             |               |     | Sediment (ng/g) |            |             |               |
|----------------|--------------|------------|-------------|---------------|-----|-----------------|------------|-------------|---------------|
|                | Min          | Max        | Mean        | Median        |     | Min             | Max        | Mean        | Median        |
| W1             | BDL          | 71.2       | 11.4        | 3.86          | S1  | 0.43            | 34.3       | 6.64        | 2.64          |
| W2             | BDL          | 183        | 25.8        | 8.96          | S2  | 0.26            | 97.7       | 18.6        | 6.16          |
| W3             | BDL          | 56.7       | 12.2        | 5.11          | S3  | 0.74            | 36.3       | 9.88        | 4.36          |
| W4             | 2.21         | 149        | 27.1        | 11.8          | S4  | 0.22            | 43.1       | 8.66        | 1.96          |
| W5             | BDL          | 84.5       | 11.1        | 2.90          | S5  | 3.56            | 67.5       | 27.6        | 22.0          |
| W6             | 0.55         | 188        | 25.4        | 5.93          | S6  | 0.14            | 15.8       | 2.98        | 1.46          |
| W7             | BDL          | 107        | 16.8        | 6.7           | S7  | 3.03            | 42.8       | 20.4        | 20.8          |
| W8             | BDL          | 144        | 17.2        | 4.72          | S8  | 0.47            | 31.7       | 6.63        | 2.16          |
| W9             | 1.39         | 88.6       | 17.5        | 8.40          | S9  | 1.02            | 63.4       | 15.2        | 5.71          |
| W10            | BDL          | 72.1       | 12.7        | 4.33          | S10 | 4.27            | 382        | 122         | 119           |
| W11            | BDL          | 151        | 29.0        | 12.1          | S11 | 0.97            | 40.2       | 13.0        | 8.16          |
| W12            | BDL          | 114        | 16.0        | 4.18          | S12 | 0.23            | 30.6       | 5.9         | 1.30          |
| W13            | BDL          | 69.0       | 16.6        | 5.58          | S13 | 0.32            | 31.3       | 6.08        | 2.40          |
| W14            | 1.26         | 126        | 22.3        | 7.16          | S14 | 0.55            | 14.6       | 4.6         | 3.15          |
| W15            | BDL          | 67.7       | 10.7        | 3.88          | S15 | 0.26            | 22.0       | 4.67        | 1.29          |
| W16            | BDL          | 90.1       | 13.1        | 3.66          | S16 | 0.27            | 52.4       | 9.50        | 4.53          |
| <b>Me-PAHs</b> | <b>Min</b>   | <b>Max</b> | <b>Mean</b> | <b>Median</b> |     | <b>Min</b>      | <b>Max</b> | <b>Mean</b> | <b>Median</b> |
| W1             | BDL          | 35.5       | 6.17        | 2.45          | S1  | BDL             | 15.6       | 1.73        | 0.13          |
| W2             | BDL          | 31.9       | 2.82        | 0.09          | S2  | BDL             | 4.16       | 0.14        | BDL           |

|              |            |            |             |               |     |            |            |             |               |
|--------------|------------|------------|-------------|---------------|-----|------------|------------|-------------|---------------|
| W3           | BDL        | 32.1       | 2.83        | 0.10          | S3  | BDL        | 31.7       | 10.9        | 9.00          |
| W4           | BDL        | 23.2       | 2.98        | 0.35          | S4  | BDL        | 16.4       | 2.98        | 1.93          |
| W5           | BDL        | 26.8       | 3.50        | 0.69          | S5  | BDL        | 9.71       | 1.28        | 0.52          |
| W6           | BDL        | 40.1       | 6.58        | 2.07          | S6  | BDL        | 9.68       | 1.05        | 0.15          |
| W7           | BDL        | 28.7       | 4.29        | 0.38          | S7  | BDL        | 13.8       | 2.63        | 1.28          |
| W8           | BDL        | 32.7       | 3.64        | 0.18          | S8  | BDL        | 9.86       | 1.89        | 1.14          |
| W9           | BDL        | 37.3       | 2.53        | 0.30          | S9  | BDL        | 6.09       | 0.87        | 0.35          |
| W10          | BDL        | 46.5       | 8.17        | 2.99          | S10 | BDL        | 7.83       | 1.76        | 1.09          |
| W11          | BDL        | 49.6       | 7.72        | 3.99          | S11 | BDL        | 9.67       | 1.60        | 0.39          |
| W12          | BDL        | 42.0       | 4.82        | 0.64          | S12 | BDL        | 13.8       | 1.90        | 0.36          |
| W13          | BDL        | 44.6       | 5.14        | 0.57          | S13 | BDL        | 9.62       | 0.98        | 0.04          |
| W14          | BDL        | 36.1       | 5.89        | 2.51          | S14 | BDL        | 13.9       | 2.82        | 2.27          |
| W15          | BDL        | 22.0       | 3.55        | 0.27          | S15 | BDL        | 62.5       | 7.39        | 4.62          |
| W16          | BDL        | 40.1       | 4.45        | 0.08          | S16 | BDL        | 11.9       | 1.66        | 0.55          |
| <b>NPAHs</b> | <b>Min</b> | <b>Max</b> | <b>Mean</b> | <b>Median</b> |     | <b>Min</b> | <b>Max</b> | <b>Mean</b> | <b>Median</b> |
| W1           | BDL        | 8.05       | 2.09        | 0.32          | S1  | BDL        | 2.62       | 0.49        | 0.07          |
| W2           | BDL        | 4.05       | 0.66        | 0.21          | S2  | BDL        | 0.52       | 0.04        | BDL           |
| W3           | BDL        | 4.20       | 0.58        | 0.06          | S3  | BDL        | 4.02       | 1.22        | 0.24          |
| W4           | BDL        | 3.19       | 0.68        | 0.26          | S4  | BDL        | 4.80       | 1.06        | 0.19          |
| W5           | BDL        | 9.05       | 1.13        | 0.17          | S5  | BDL        | 0.63       | 0.14        | 0.01          |
| W6           | BDL        | 9.12       | 1.76        | 0.60          | S6  | BDL        | 2.07       | 0.29        | 0.01          |
| W7           | BDL        | 11.5       | 3.42        | 0.85          | S7  | BDL        | 1.63       | 0.22        | 0.04          |
| W8           | BDL        | 1.76       | 0.45        | 0.25          | S8  | BDL        | 4.08       | 0.85        | 0.35          |
| W9           | BDL        | 3.72       | 0.62        | 0.05          | S9  | BDL        | 4.34       | 0.61        | 0.07          |
| W10          | BDL        | 6.36       | 0.79        | 0.15          | S10 | BDL        | 2.34       | 0.66        | 0.31          |
| W11          | BDL        | 2.50       | 0.44        | 0.14          | S11 | BDL        | 1.93       | 0.44        | 0.10          |
| W12          | BDL        | 13.2       | 2.44        | 0.40          | S12 | BDL        | 1.77       | 0.42        | 0.10          |
| W13          | BDL        | 4.28       | 1.50        | 0.63          | S13 | 0.04       | 5.70       | 3.12        | 2.29          |
| W14          | BDL        | 6.40       | 1.59        | 0.97          | S14 | BDL        | 2.14       | 0.72        | 0.48          |
| W15          | BDL        | 2.65       | 0.33        | 0.04          | S15 | BDL        | 3.45       | 2.86        | 0.64          |
| W16          | BDL        | 6.12       | 0.83        | 0.01          | S16 | BDL        | 1.17       | 0.25        | 0.04          |

**Table S4.** Concentrations of target compounds in water (ng/L) samples from the Songhua River, North China.

| PAHs                    | Abbrevia-<br>tion | Ring nu | Min  | Max  | Median | STD  | Skewness | Kurtosis |
|-------------------------|-------------------|---------|------|------|--------|------|----------|----------|
| Naphthalene             | NaP               | 2       | 56.7 | 188  | 98.7   | 43.5 | 0.57     | -0.98    |
| Acenaphthylene          | Acy               | 2       | 2.72 | 22.3 | 12.0   | 6.27 | 0.29     | -1.12    |
| Acenaphthene            | Ace               | 3       | 3.53 | 15.3 | 8.68   | 3.22 | 0.43     | -0.14    |
| Fluorene                | Flu               | 3       | 18.3 | 57.1 | 29.9   | 11.2 | 0.77     | 0.06     |
| Phenanthrene            | Phe               | 3       | 33.0 | 120  | 54.0   | 25.3 | 1.00     | 0.41     |
| Anthracene              | Ant               | 3       | 2.67 | 10.4 | 5.74   | 2.41 | 0.53     | -0.37    |
| Fluoranthene            | Fluo              | 4       | 6.61 | 34.6 | 11.2   | 7.93 | 1.30     | 1.20     |
| Pyrene                  | Pyr               | 4       | 4.75 | 31.2 | 7.92   | 7.54 | 1.54     | 2.14     |
| Benz[a]anthracene       | BaA               | 4       | 1.44 | 12.6 | 3.26   | 3.02 | 1.87     | 3.52     |
| Chrysene                | Chr               | 4       | 1.45 | 10.1 | 3.31   | 2.87 | 1.14     | 0.14     |
| Benzo[b]fluoranthene    | BbF               | 5       | 1.97 | 16.0 | 4.06   | 4.53 | 1.60     | 1.19     |
| Benzo[k]fluoranthene    | BkF               | 5       | 1.68 | 13.8 | 4.37   | 3.36 | 1.77     | 2.79     |
| Benzo[a]pyrene          | BaP               | 5       | BDL  | 11.0 | 3.61   | 2.68 | 1.16     | 1.88     |
| Indeno[1,2cd]pyrene     | IcdP              | 6       | BDL  | 8.52 | 2.45   | 2.36 | 1.44     | 2.09     |
| Dibenzo[a,h]anthrathene | DahA              | 5       | BDL  | 2.22 | 0      | 0.67 | 1.97     | 3.11     |
| Benzo[g,h,i]perylene    | BghiP             | 6       | BDL  | 8.47 | 3.12   | 2.25 | 1.13     | 1.18     |
| ΣPAHs                   | -                 | -       | 135  | 562  | 252    | 129  | 18.6     | 17.10    |
| Σ2-3 ring               | -                 | -       | 117  | 413  | 209    | 92.1 | 3.62     | -2.14    |
| Σ4-6ring                | -                 | -       | 17.9 | 148  | 43.3   | 37.2 | 14.9     | 19.20    |
| LMW/HMW                 | -                 | -       | 6.53 | 2.78 | 4.81   | 2.47 | 0.24     | -0.11    |
| ΣPAHcarc                | -                 | -       | 6.54 | 74.5 | 21.3   | 19.5 | 10.9     | 14.70    |
| <b>Me-PAHs</b>          |                   |         |      |      |        |      |          |          |
| 2-Methylnaphthalene.    | 2-MNAP            | 2       | BDL  | 49.6 | 26.6   | 12.3 | -0.47    | 0.83     |
| 1-Methylnaphthalene.    | 1-MNAP            | 2       | BDL  | 34.7 | 18.4   | 8.28 | -0.13    | 1.19     |
| 2,6-Dimethylnaphthalene | 2,6-DMNAP         | 2       | 0.38 | 14.3 | 6.41   | 3.05 | 0.56     | 2.36     |
| 2,7-Dimethylnaphthalene | 2,7-DMNAP         | 2       | 0.38 | 14.3 | 6.41   | 3.05 | 0.56     | 2.36     |
| 1,3-Dimethylnaphthalene | 1,3-DMNAP         | 2       | 0.3  | 16.4 | 8.95   | 3.86 | -0.02    | 1.09     |
| 1,6-Dimethylnaphthalene | 1,6-DMNAP         | 2       | BDL  | 10.2 | 3.45   | 2.50 | 1.28     | 2.39     |
| 1,4-Dimethylnaphthalene | 1,4-DMNAP         | 2       | 0.33 | 6.48 | 3.19   | 1.54 | 0.45     | 0.88     |
| 1,5-Dimethylnaphthalene | 1,5-DMNAP         | 2       | 0.22 | 4    | 1.68   | 0.89 | 0.76     | 1.51     |
| 1,2-Dimethylnaphthalene | 1,2-DMNAP         | 2       | BDL  | 5.34 | 2.70   | 1.24 | 0.29     | 1.77     |

|                                |            |   |      |      |       |      |       |       |
|--------------------------------|------------|---|------|------|-------|------|-------|-------|
| 2-Methylphenanthrene.          | 2-MPHE     | 3 | 0.51 | 5.62 | 1.508 | 1.47 | 1.21  | 1.02  |
| 2-Methylanthracene             | 2-MANT     | 3 | 1.26 | 7.69 | 2.76  | 1.86 | 1.07  | 0.66  |
| 1-Methylanthracene             | 1-MANT     | 3 | 0.09 | 4.3  | 1.13  | 1.16 | 1.24  | 1.11  |
| 1-Methylphenanthrene           | 1-MPHE     | 3 | BDL  | 1.15 | BDL   | 0.32 | 2.70  | 6.86  |
| 9-Methylanthracene             | 9-MANT     | 3 | BDL  | 44.6 | 30.5  | 10.6 | -1.13 | 2.52  |
| 3,6-Dimethylphenanthrene       | 3,6-DMPHE  | 3 | 0.22 | 1.24 | 0.50  | 0.32 | 0.87  | -0.34 |
| 2,3-Dimethylanthracene         | 2,3-DMA    | 3 | BDL  | 0.41 | 0.08  | 0.12 | 1.09  | 0.26  |
| 9,10-Dimethylanthracene        | 9,10-DMA   | 3 | 0.86 | 19.9 | 8.36  | 6.53 | 0.36  | -1.13 |
| 9-Methylphenylfluorene         | 9-MMHEN    | 3 | BDL  | 2.76 | 0.00  | 0.68 | 3.99  | 15.9  |
| 2-Methylfluoranthene           | 2-MFLU     | 4 | 0.1  | 3.43 | 0.30  | 0.93 | 1.97  | 3.86  |
| 1-Methylpyrene                 | 1-MPYR     | 4 | 0.03 | 1.34 | 0.18  | 0.47 | 0.73  | -1.23 |
| 1,2-Methylbenzaanthracene      | 1,2-MBaA   | 4 | BDL  | 1.19 | BDL   | 0.30 | 3.27  | 11.5  |
| 7,9-Methylbenzaanthracene      | 7,9-MBaA   | 4 | BDL  | 3.8  | BDL   | 1.28 | 1.04  | -0.24 |
| 4,6-Methylbenzaanthracene      | 4,6-MBaA   | 4 | BDL  | 1.77 | BDL   | 0.52 | 1.89  | 3.30  |
| 3,5-Methylbenzaanthracene      | 3,5-MBaA   | 4 | BDL  | 35.5 | BDL   | 16.6 | 0.89  | -1.38 |
| 10-Methylbenzaanthracene       | 10-MBaA    | 4 | BDL  | 20.7 | BDL   | 8.15 | 1.77  | 1.29  |
| 5,8-Dimethylbenzocphenanthrene | 5,8-DMBcPH | 4 | BDL  | 2.8  | BDL   | 0.98 | 1.56  | 1.22  |
| 6,8-Dimethylbenzaanthracene    | 6,8-DMBaA  | 4 | BDL  | 3.02 | BDL   | 0.98 | 1.97  | 2.66  |
| 3,9-Dimethylbenzaanthracene    | 3,9-DMBaA  | 4 | BDL  | 0.72 | BDL   | 0.25 | 1.85  | 1.83  |
| 7,12-Dimethylbenzaanthracene   | 7,12-DMBaA | 4 | BDL  | 0.65 | BDL   | 0.19 | 2.11  | 4.1   |
| 3-Methylcholanthrene           | 3-MCHA     | 3 | BDL  | 14.3 | 1.65  | 5.79 | 0.73  | -1.28 |
| 8,9-Methylbenzoapyrene         | 8,9-MCHA   | 3 | BDL  | 17.7 | 0.56  | 4.81 | 2.52  | 6.55  |
| 7,10-Methylbenzoapyrene        | 7,10-MBaP  | 5 | BDL  | 2.78 | BDL   | 0.74 | 2.44  | 6.71  |
| 7,10-Dimethylbenzoapyrene      | 7,10-DMBaP | 5 | BDL  | 2.25 | 0.35  | 0.81 | 0.74  | -1.03 |
| ΣMe-PAHs                       | -          | - | 9.36 | 711  | 126   | 206  | 80.5  | 158   |
| Σ2-3 ring                      | -          | - | 4.55 | 243  | 122   | 59.9 | 14.7  | 41.3  |
| Σ4-6ring                       | -          | - | 4.81 | 467  | 3.06  | 145  | 65.8  | 117   |
| LMW/HMW                        | -          | - | 0.94 | 0.52 | 40.1  | 0.41 | 0.22  | 0.35  |
| <b>NPAHs</b>                   |            |   |      |      |       |      |       |       |
| 1-Nitronaphthalene             | 1-NN       | 2 | BDL  | 1.67 | 1.10  | 0.50 | 1.34  | 1.09  |
| 2-Nitronaphthalene             | 2-NN       | 2 | BDL  | 5.39 | 0.10  | 1.59 | 1.68  | 2.39  |
| 2-Nitrobiphenyl                | 2-NBP      | 2 | BDL  | 5.28 | 0.06  | 1.85 | 0.81  | -0.80 |
| 4-Nitrobiphenyl                | 4-NBP      | 2 | BDL  | 0.54 | BDL   | 0.15 | 1.14  | 0.56  |
| 5-Nitroacenaphthene            | 5-NAC      | 3 | BDL  | 1.11 | 0.16  | 0.33 | 1.62  | 1.82  |
| 2,2'-Dinitrobiphenyl           | 2,2'-DBP   | 2 | BDL  | 0.11 | BDL   | 0.02 | 3.87  | 15.2  |
| 9-Nitroanthracene              | 9-NAN      | 3 | BDL  | 13.2 | 0.16  | 3.85 | 2.46  | 5.44  |
| 9-Nitrophenanthrene            | 9-NPH      | 3 | BDL  | 4.59 | 0.69  | 1.14 | 2.58  | 8.14  |
| 2-Nitrodibenzothiophene        | 2-NDB      | 3 | 0.03 | 1.36 | 0.26  | 0.40 | 1.30  | 0.93  |
| 3-Nitrophenanthrene            | 3-NPH      | 3 | 0.12 | 2.86 | 0.40  | 0.66 | 3.03  | 10.4  |
| 2-Nitroanthracene              | 2-NAN      | 3 | 0.39 | 11.5 | 3.96  | 3.47 | 0.59  | -0.81 |
| 9,10-Dinitroanthracene         | 9,10-DNAN  | 3 | 0.72 | 8.8  | 3.31  | 2.82 | 0.49  | -1.21 |
| ΣNPAHs                         | -          | - | 1.26 | 56.5 | 10.2  | 7.35 | 5.41  | 11.3  |

**Table S5.** Concentrations of target compounds in sediment (ng/g dw) samples from the Songhua River, North China.

| PAHs                   | Abbreviation | Ring nu | Min  | Max  | Median | STD  | Skewness | Kurtosis |
|------------------------|--------------|---------|------|------|--------|------|----------|----------|
| Naphthalene            | NaP          | 2       | 1.74 | 55.8 | 20.0   | 14.9 | 0.74     | 0.49     |
| Acenaphthylene         | Acy          | 2       | 0.14 | 19.2 | 1.39   | 4.53 | 3.70     | 14.3     |
| Acenaphthene           | Ace          | 3       | 0.3  | 6.06 | 2.90   | 1.59 | 0.07     | -0.56    |
| Fluorene               | Flu          | 3       | 2.57 | 19.5 | 11.5   | 4.59 | -0.2     | -0.21    |
| Phenanthrene           | Phe          | 3       | 14.6 | 112  | 36.3   | 27.3 | 1.44     | 1.78     |
| Anthracene             | Ant          | 3       | 1.19 | 36.4 | 3.75   | 8.49 | 3.38     | 12.3     |
| Fluoranthene           | Fluo         | 4       | 6    | 382  | 13.0   | 92.2 | 3.68     | 14.1     |
| Pyrene                 | Pyr          | 4       | 4.84 | 250  | 16.2   | 59.4 | 3.58     | 13.5     |
| Benz[a]anthracene      | BaA          | 4       | 0.63 | 183  | 4.11   | 44.6 | 3.84     | 15.0     |
| Chrysene               | Chr          | 4       | 0.34 | 158  | 5.45   | 38.5 | 3.60     | 13.6     |
| Benzo[b]fluoranthene   | BbF          | 5       | 1.43 | 213  | 5.10   | 52.1 | 3.70     | 14.2     |
| Benzo[k]fluoranthene   | BkF          | 5       | 0.6  | 66.8 | 1.28   | 16.3 | 3.77     | 14.6     |
| Benzo[a]pyrene         | BaP          | 5       | 0.6  | 163  | 2.18   | 40.2 | 3.85     | 15.1     |
| Indeno[1,2,3-cd]pyrene | IcdP         | 6       | 0.35 | 172  | 2.51   | 42.5 | 3.79     | 14.7     |
| Dibenz[a,h]anthracene  | DahA         | 5       | 0.21 | 32.8 | 0.51   | 8.06 | 3.82     | 14.9     |
| Benzo[g,h,i]perylene   | BghiP        | 6       | 0.22 | 126  | 2.31   | 31.0 | 3.70     | 14.2     |
| ΣPAHs                  | -            | -       | 35.8 | 200  | 129    | 486  | 46.5     | 172      |
| Σ2-3 ring              | -            | -       | 20.6 | 249  | 76.1   | 61.4 | 9.14     | 28.1     |
| Σ4-6ring               | -            | -       | 15.2 | 1750 | 52.7   | 425  | 37.3     | 144      |
| LMW/HMW                | -            | -       | 1.35 | 0.14 | 1.44   | 0.14 | 0.24     | 0.19     |

|                               |            |   |      |      |      |      |       |       |
|-------------------------------|------------|---|------|------|------|------|-------|-------|
| $\Sigma$ PAHcarc              | -          | - | 4.16 | 988  | 20.9 | 242  | 26.4  | 102   |
| <b>Me-PAHs</b>                |            |   |      |      |      |      |       |       |
| Methylnaphthalene.2           | 2-MNAP     | 2 | BDL  | 23.2 | 9.69 | 5.29 | 0.30  | 1.59  |
| Methylnaphthalene.1           | 1-MNAP     | 2 | BDL  | 15.6 | 5.59 | 3.52 | 0.76  | 2.26  |
| Dimethylnaphthalene2.6        | 2,6-DMNAP  | 2 | BDL  | 8.32 | 2.60 | 2.00 | 1.55  | 3.16  |
| Dimethylnaphthalene2.7        | 2,7-DMNAP  | 2 | 0.1  | 8.32 | 2.60 | 1.99 | 1.58  | 3.21  |
| Dimethylnaphthalene1.3        | 1,3-DMNAP  | 2 | 0.31 | 13.8 | 4.07 | 2.90 | 2.20  | 7.54  |
| Dimethylnaphthalene1.6        | 1,6-DMNAP  | 2 | BDL  | 13.9 | 2.88 | 3.12 | 2.86  | 9.99  |
| Dimethylnaphthalene1.4        | 1,4-DMNAP  | 2 | BDL  | 6.12 | 1.76 | 1.32 | 2.29  | 7.78  |
| Dimethylnaphthalene1.5        | 1,5-DMNAP  | 2 | 0.04 | 5.03 | 1.03 | 1.12 | 3.02  | 10.9  |
| Dimethylnaphthalene1.2        | 1,2-DMNAP  | 2 | BDL  | 4.8  | 1.10 | 1.05 | 2.75  | 9.54  |
| Methylphenanthrene.2          | 2-MPHE     | 3 | BDL  | 14.1 | 0.95 | 4.32 | 2.39  | 4.58  |
| Methylanthracene.2            | 2-MANT     | 3 | 0.15 | 21.1 | 1.94 | 5.47 | 2.65  | 6.94  |
| Methylanthracene.1            | 1-MANT     | 3 | BDL  | 13.1 | 0.91 | 3.59 | 2.38  | 5.36  |
| Methylphenanthrene.1          | 1-MPHE     | 3 | BDL  | 11.3 | 0.82 | 3.41 | 2.31  | 4.43  |
| Methylanthracene.9            | 9-MANT     | 3 | BDL  | 62.5 | 7.33 | 15.2 | 2.79  | 8.44  |
| Dimethylphenanthrene3.6       | 3,6-DMPHE  | 3 | BDL  | 5.38 | 0.32 | 1.31 | 3.13  | 10.7  |
| Dimethylanthracene2.3         | 2,3-DMA    | 3 | BDL  | 1.49 | 0.08 | 0.39 | 2.39  | 5.85  |
| Dimethylanthracene9.10        | 9,10-DMA   | 3 | BDL  | 0.77 | 0.05 | 0.21 | 1.77  | 3.39  |
| Methylphenylfluorene9.9       | 9-MMHEN    | 3 | BDL  | 0.1  | 0.00 | 0.02 | 3.48  | 12.7  |
| Methylfluoranthene.2          | 2-MFLU     | 4 | 0.02 | 13.6 | 0.30 | 4.43 | 2.38  | 4.48  |
| Methylpyrene.1                | 1-MPYR     | 4 | BDL  | 12.3 | 0.37 | 3.52 | 2.34  | 5.02  |
| Methylbenzaanthracene1.2      | 1,2-MBaA   | 4 | BDL  | 7.08 | 0.05 | 1.94 | 2.80  | 7.62  |
| Methylbenzaanthracene7.9      | 7,9-MBaA   | 4 | BDL  | 31.2 | 0.74 | 8.38 | 2.91  | 8.42  |
| Methylbenzaanthracene4.6      | 4,6-MBaA   | 4 | BDL  | 8.71 | 0.25 | 2.41 | 2.71  | 6.93  |
| Methylbenzaanthracene3.5      | 3,5-MBaA   | 4 | BDL  | 11.2 | 6.17 | 3.68 | -0.33 | -1.05 |
| Methylbenzaanthracene10       | 10-MBaA    | 4 | BDL  | 10.3 | 3.42 | 3.14 | 0.93  | 0.58  |
| Dimethylbenzocphenanthrene5.8 | 5,8-DMBcPH | 4 | BDL  | 14.8 | 0.60 | 3.67 | 3.32  | 11.7  |
| Dimethylbenzaanthracene6.8    | 6,8-DMBaA  | 4 | BDL  | 5.75 | 0.21 | 1.55 | 2.70  | 7.18  |
| Dimethylbenzaanthracene3.9    | 3,9-DMBaA  | 4 | BDL  | 9    | 0.27 | 2.31 | 3.04  | 9.66  |
| Dimethylbenzaanthracene7.12   | 7,12-DMBaA | 4 | BDL  | 4.8  | 0.17 | 1.20 | 3.35  | 11.8  |
| Methylcholanthrene3           | 3-MCHA     | 3 | BDL  | 4.6  | 0    | 1.15 | 4     | 16    |
| Methylbenzoapyrene8.9         | 3,9-MCHA   | 3 | BDL  | 25.3 | 0.54 | 7.30 | 2.52  | 5.68  |
| Methylbenzoapyrene7.10        | 7,10-MBaP  | 5 | BDL  | 4.65 | 0.29 | 1.52 | 2.42  | 4.61  |
| Dimethylbenzoapyrene7.10      | 7,10-DMBaP | 5 | BDL  | 1.58 | 0    | 0.39 | 3.74  | 14.4  |
| $\Sigma$ Me-PAHs              |            |   | 0.62 | 394  | 57.2 | 103  | 79.5  | 231   |
| $\Sigma$ 2-3 ring             |            |   | 0.6  | 259  | 43.7 | 64.8 | 47.2  | 140   |
| $\Sigma$ 4-6ring              |            |   | 0.02 | 135  | 13.4 | 38.2 | 32.3  | 91.5  |
| LMW/HMW                       |            |   | 30   | 1.91 | 3.25 | 1.69 | 1.45  | 1.53  |
| <b>NPAHs</b>                  |            |   |      |      |      |      |       |       |
| 1-Nitronaphthalene            | 1-NN       | 2 | BDL  | 0.58 | 1.28 | 0.14 | 2.79  | 9.10  |
| 2-Nitronaphthalene            | 2-NN       | 2 | BDL  | 0.65 | 0.01 | 0.20 | 1.67  | 1.91  |
| 2-Nitrobiphenyl               | 2-NBP      | 2 | BDL  | 9.74 | 0.05 | 2.26 | 3.07  | 10.7  |
| 4-Nitrobiphenyl               | 4-NBP      | 2 | BDL  | 0.13 | 0.00 | 0.03 | 1.87  | 3.97  |
| 5-Nitroacenaphthene           | 5-NAC      | 3 | BDL  | 1.91 | 0.11 | 0.45 | 3.50  | 13.1  |
| 2,2'-Dinitrobiphenyl          | 2,2'-DBP   | 2 | BDL  | 0.05 | 0    | 0.01 | 1.49  | 0.47  |
| 9-Nitroanthracene             | 9-NAN      | 3 | BDL  | 23.9 | 0.30 | 5.87 | 3.65  | 13.9  |
| 9-Nitrophenanthrene           | 9-NPH      | 3 | BDL  | 19.6 | 0.90 | 4.81 | 3.42  | 12.4  |
| 2-Nitrodibenzothiophene       | 2-NDB      | 3 | BDL  | 0.22 | 0.00 | 0.05 | 3.53  | 13.1  |
| 3-Nitrophenanthrene           | 3-NPH      | 3 | BDL  | 1.24 | 0.10 | 0.32 | 2.22  | 5.69  |
| 2-Nitroanthracene             | 2-NAN      | 3 | 0.28 | 56.7 | 0.91 | 13.9 | 3.97  | 15.8  |
| 9,10-Dinitroanthracene        | 9,10-DNAN  | 3 | BDL  | 55.4 | 1.74 | 17.9 | 2.48  | 4.84  |
| $\Sigma$ NPAHs                |            |   | 0.28 | 170  | 5.4  | 45.9 | 33.6  | 104   |

**Table S6.** Physicochemical characteristics of sediment and water samples.

| Sediment     | Tem.<br>(°C) | Pres<br>(mmHg) | Dissolved<br>oxygen (%) | Conductivity<br>(mS/cm) | TDS<br>(g/L) | Salinity<br>(PSU) | pH   | DOC<br>(mg/L) | TOC<br>(%) |
|--------------|--------------|----------------|-------------------------|-------------------------|--------------|-------------------|------|---------------|------------|
| S1           | 13.6         | 754            | 93.7                    | 172                     | 0.11         | 0.08              | 6.7  | 4.60          | 5.16       |
| S2           | 25.8         | 755            | 79.8                    | 174                     | 0.11         | 0.08              | 7.09 | 5.86          | 19.6       |
| S3           | 29.3         | 756            | 100                     | 162                     | 0.11         | 0.07              | 7.99 | 4.85          | 5.02       |
| S4           | 25.8         | 755            | 87.2                    | 212                     | 0.14         | 0.1               | 7.45 | 4.45          | 6.16       |
| S5           | 27.4         | 759            | 85.8                    | 265                     | 0.17         | 0.12              | 7.15 | 9.35          | 11.4       |
| S6           | 24           | 754            | 102                     | 122                     | 0.08         | 0.06              | 7.37 | 4.41          | 4.59       |
| S7           | 27.3         | 761            | 112                     | 217                     | 0.14         | 0.1               | 8.62 | 5.94          | 5.87       |
| S8           | 23.2         | 762            | 92                      | 177                     | 0.12         | 0.08              | 7.57 | 5.74          | 6.79       |
| S9           | 13.3         | 767            | 102                     | 151                     | 0.1          | 0.07              | 7.66 | 5.3           | 5.8        |
| S10          | 22.1         | 758            | 100                     | 93.9                    | 0.06         | 0.04              | 7.1  | 9.67          | 9.83       |
| S11          | 17.9         | 759            | 127                     | 109                     | 0.07         | 0.05              | 8.16 | 7.51          | 4.94       |
| S12          | 24.1         | 753            | 88                      | 131                     | 0.09         | 0.06              | 7.04 | 7.17          | 10.4       |
| S13          | 21           | 757            | 92.7                    | 255                     | 0.17         | 0.12              | 7.05 | 4.21          | 5.28       |
| S14          | 23.1         | 762            | 103                     | 69.1                    | 0.04         | 0.03              | 7.87 | 8.05          | 8.54       |
| S15          | 20.9         | 765            | 95.7                    | 202                     | 0.13         | 0.09              | 7.74 | 5.45          | 5.11       |
| S16          | 27.7         | 759            | 107                     | 155                     | 0.1          | 0.07              | 7.37 | 6.04          | 6.05       |
| Min          | 13.3         | 753            | 79.8                    | 69.1                    | 0.04         | 0.03              | 6.7  | 4.21          | 4.59       |
| Max          | 29.3         | 767            | 127                     | 265                     | 0.17         | 0.12              | 8.62 | 9.67          | 19.6       |
| Mean         | 22.7         | 759            | 98.8                    | 167                     | 0.10         | 0.07              | 7.51 | 6.25          | 8.04       |
| <b>Water</b> |              |                |                         |                         |              |                   |      |               |            |
| W1           | 12.6         | 750            | 8.8                     | 69.1                    | 0.04         | 0.03              | 6.62 | 3.63          | 4.34       |
| W2           | 29.3         | 855            | 127                     | 653                     | 0.42         | 0.32              | 8.62 | 14.3          | 19.6       |
| W3           | 23.0         | 761            | 95.3                    | 186                     | 0.12         | 0.08              | 7.49 | 5.73          | 7.21       |
| W4           | 3.73         | 15.1           | 17.7                    | 90.1                    | 0.05         | 0.04              | 7.02 | 1.89          | 3.43       |
| W5           | 23.1         | 759            | 97.4                    | 172                     | 0.11         | 0.08              | 7.65 | 5.3           | 5.87       |
| W6           | 21           | 755            | 88                      | 144                     | 0.09         | 0.07              | 7.13 | 4.78          | 5.06       |
| W7           | 25.8         | 765            | 103                     | 203                     | 0.13         | 0.09              | 7.75 | 5.89          | 7.89       |
| W8           | 12.6         | 750            | 8.8                     | 69.1                    | 0.04         | 0.03              | 6.62 | 3.63          | 4.34       |
| W9           | 29.3         | 855            | 127                     | 653                     | 0.42         | 0.32              | 8.62 | 14.3          | 19.6       |
| W10          | 23.0         | 761            | 95.8                    | 186                     | 0.12         | 0.08              | 7.49 | 5.73          | 7.21       |
| W11          | 3.74         | 15.1           | 17.8                    | 90.1                    | 0.05         | 0.04              | 7.31 | 1.89          | 3.44       |
| W12          | 23.1         | 759            | 97.4                    | 172                     | 0.11         | 0.08              | 7.65 | 5.3           | 5.87       |
| W13          | 21           | 755            | 88                      | 144                     | 0.09         | 0.07              | 7.13 | 4.78          | 5.06       |
| W14          | 25.8         | 765            | 103                     | 203                     | 0.13         | 0.09              | 7.75 | 5.89          | 7.89       |
| W15          | 21           | 755            | 102                     | 189                     | 0.42         | 0.2               | 7.37 | 4.41          | 7.51       |
| W16          | 20.6         | 757            | 89.5                    | 171                     | 0.13         | 0.12              | 7.05 | 8.37          | 11.4       |
| Min          | 3.73         | 15.1           | 8.8                     | 69.1                    | 0.04         | 0.03              | 6.62 | 1.89          | 3.43       |
| Max          | 29.3         | 855            | 127                     | 653                     | 0.42         | 0.32              | 8.62 | 14.3          | 19.6       |
| Mean         | 19.54        | 650            | 78.1                    | 228                     | 0.16         | 0.11              | 6.38 | 6.23          | 8.26       |

**Table S7.** Factor pattern of PCA for PAHs in water, sediment, of the Songhua River Basin, China.

| PAHs | Water |       |       | Sediment |       |
|------|-------|-------|-------|----------|-------|
|      | PC1   | PC2   | PC3   | PC1      | PC2   |
| NaP  | 0.48  | 0.61  | 0.25  | 0.15     | 0.94  |
| Acy  | 0.57  | 0.65  | -0.40 | 0.99     | 0.02  |
| Ace  | 0.3   | 0.70  | 0.35  | 0.37     | 0.88  |
| Flu  | 0.58  | 0.78  | 0.00  | 0.30     | 0.82  |
| Phe  | 0.72  | 0.30  | 0.40  | 0.75     | 0.121 |
| Ant  | 0.50  | 0.49  | 0.20  | 0.99     | 0.02  |
| Fluo | 0.95  | -0.09 | -0.23 | 0.99     | -0.11 |
| Pyr  | 0.92  | -0.14 | -0.28 | 0.99     | -0.07 |
| BaA  | 0.87  | -0.01 | -0.3  | 0.99     | -0.11 |
| Chr  | 0.91  | -0.29 | 0.10  | 0.99     | -0.06 |
| BbF  | 0.79  | -0.24 | 0.25  | 0.99     | -0.06 |
| BkF  | 0.64  | 0.49  | -0.24 | 0.99     | -0.09 |
| BaP  | 0.85  | -0.33 | -0.09 | 0.99     | -0.09 |

|            |      |       |      |      |       |
|------------|------|-------|------|------|-------|
| IcdP       | 0.65 | −0.69 | 0.26 | 0.99 | −0.09 |
| DahA       | 0.76 | −0.48 | 0.08 | 0.99 | −0.08 |
| BghiP      | 0.79 | −0.40 | 0.07 | 0.99 | −0.07 |
| % Variance | 53.5 | 22.8  | 6.33 | 79.0 | 15.2  |

**Table S8.** PAHs TEQ concentrations in different sediment sites (ng/g dw).

| Summer                 |      |      |      |      |      |      |      |      |      |      |      |      |      |      |      |      |      |
|------------------------|------|------|------|------|------|------|------|------|------|------|------|------|------|------|------|------|------|
| PA-H <sub>scarce</sub> | TEF  | S1   | S2   | S3   | S4   | S5   | S6   | S7   | S8   | S9   | S10  | S11  | S12  | S13  | S14  | S15  | S16  |
| BaA                    | 0.1  | 0.14 | 1.29 | 0.31 | 0.15 | 2.59 | 0.41 | 1.79 | 0.63 | 0.41 | 0.71 | 0.84 | 0.06 | 0.36 | 0.30 | 0.11 | 18.3 |
| Chr                    | 0.01 | 0.02 | 0.17 | 0.06 | 0.02 | 0.33 | 0.03 | 0.25 | 0.02 | 0.11 | 0.05 | 0.16 | BDL  | 0.02 | 0.05 | BDL  | 1.58 |
| BbF                    | 0.1  | 0.31 | 1.24 | 1.27 | 0.15 | 3.99 | 0.23 | 3.16 | 0.33 | 1.00 | 0.38 | 1.71 | 0.45 | 0.25 | 0.56 | 0.14 | 21.3 |
| BkF                    | 0.1  | 0.17 | 0.25 | 0.14 | 0.07 | 0.93 | 0.09 | 1.10 | 0.11 | 0.18 | 0.09 | 0.35 | 0.10 | 0.06 | 0.11 | 0.06 | 6.68 |
| BaP                    | 1    | 0.60 | 5.87 | 3.77 | 0.77 | 21.4 | 1.03 | 16.4 | 1.43 | 3.76 | 1.44 | 7.43 | 1.06 | 0.71 | 2.93 | 1.07 | 163  |
| DahA                   | 1    | 0.43 | 1.03 | 0.74 | 0.38 | 4.37 | 0.21 | 4.44 | 0.47 | 1.02 | 0.27 | 0.97 | 0.23 | 0.32 | 0.55 | 0.26 | 32.8 |
| BghiP                  | 0.01 | 0.01 | 0.04 | 0.04 | BDL  | 0.18 | BDL  | 0.23 | 0.01 | 0.04 | 0.01 | 0.06 | BDL  | BDL  | 0.02 | BDL  | 1.26 |
| Min                    |      | 0.01 | 0.04 | 0.04 | BDL  | 0.18 | BDL  | 0.23 | 0.01 | 0.04 | 0.01 | 0.06 | BDL  | BDL  | 0.02 | BDL  | 1.26 |
| Max                    |      | 0.60 | 5.87 | 3.77 | 0.77 | 21.4 | 1.03 | 16.4 | 1.43 | 3.76 | 1.44 | 7.43 | 1.06 | 0.71 | 2.93 | 1.07 | 163  |
| Mean                   |      | 0.24 | 1.41 | 0.90 | 0.22 | 4.83 | 0.29 | 3.91 | 0.43 | 0.93 | 0.42 | 1.64 | 0.27 | 0.24 | 0.64 | 0.23 | 35.1 |
| Σ TE-Q <sub>carc</sub> |      | 1.70 | 9.91 | 6.34 | 1.55 | 33.8 | 2.03 | 27.4 | 3.01 | 6.53 | 2.97 | 11.5 | 1.92 | 1.74 | 4.54 | 1.66 | 246  |
| Winter                 |      |      |      |      |      |      |      |      |      |      |      |      |      |      |      |      |      |
| BaA                    | 0.1  | 0.02 | 0.07 | 0.04 | 0.12 | 0.14 | 0.19 | 0.32 | 0.19 | 0.59 | 0.37 | 0.81 | 0.22 | 0.42 | 0.28 | 0.20 | 0.54 |
| Chr                    | 0.01 | BDL  | BDL  | BDL  | BDL  | 0.33 | 0.03 | 0.04 | 0.01 | 0.08 | 0.03 | 0.05 | 0.02 | 0.03 | 0.06 | 0.01 | 0.01 |
| BbF                    | 0.1  | 0.03 | 0.04 | 0.04 | 0.13 | 0.35 | 0.23 | 0.52 | 0.38 | 1.10 | 0.29 | 1.60 | 0.25 | 0.39 | 0.40 | 0.47 | 0.20 |
| BkF                    | 0.1  | 0.03 | 0.12 | 0.04 | 0.06 | 0.22 | 0.29 | 0.33 | 0.11 | 0.47 | 0.26 | 0.98 | 0.47 | 0.20 | 0.59 | 0.28 | 0.16 |
| BaP                    | 1    | 3.61 | 5.85 | 3.44 | 11.0 | 1.67 | 3.69 | 0.70 | 1.43 | 8.30 | 2.91 | 5.53 | 1.01 | 3.02 | 5.75 | 3.06 | 2.10 |
| DahA                   | 1    | 0.1  | 0.60 | 0.20 | 2.21 | 0.10 | 0.55 | 0.40 | 0.47 | 1.39 | 0.24 | 0.30 | 0.10 | 0.09 | 1.26 | 0.90 | 1.34 |
| BghiP                  | 0.01 | BDL  | BDL  | BDL  | BDL  | 0.01 | 0.03 | 0.03 | 0.01 | 0.05 | 0.02 | 0.02 | BDL  | 0.01 | 0.04 | 0.02 | 0.01 |
| Min                    |      | BDL  | BDL  | BDL  | BDL  | 0.01 | 0.03 | 0.03 | 0.01 | 0.05 | 0.02 | 0.02 | BDL  | 0.01 | 0.04 | 0.01 | 0.01 |
| Max                    |      | 3.61 | 5.85 | 3.44 | 11.0 | 1.67 | 3.69 | 0.7  | 3.61 | 8.30 | 2.91 | 5.53 | 1.06 | 3.02 | 5.75 | 3.06 | 2.10 |
| Mean                   |      | 0.54 | 0.95 | 0.53 | 1.93 | 0.33 | 0.73 | 0.33 | 0.65 | 1.71 | 0.60 | 1.33 | 0.27 | 0.59 | 1.20 | 0.70 | 0.62 |
| Σ TE-Q <sub>carc</sub> |      | 3.79 | 6.69 | 3.77 | 13.5 | 2.37 | 5.15 | 2.35 | 4.59 | 11.9 | 4.21 | 9.31 | 1.92 | 4.19 | 8.41 | 4.95 | 4.40 |



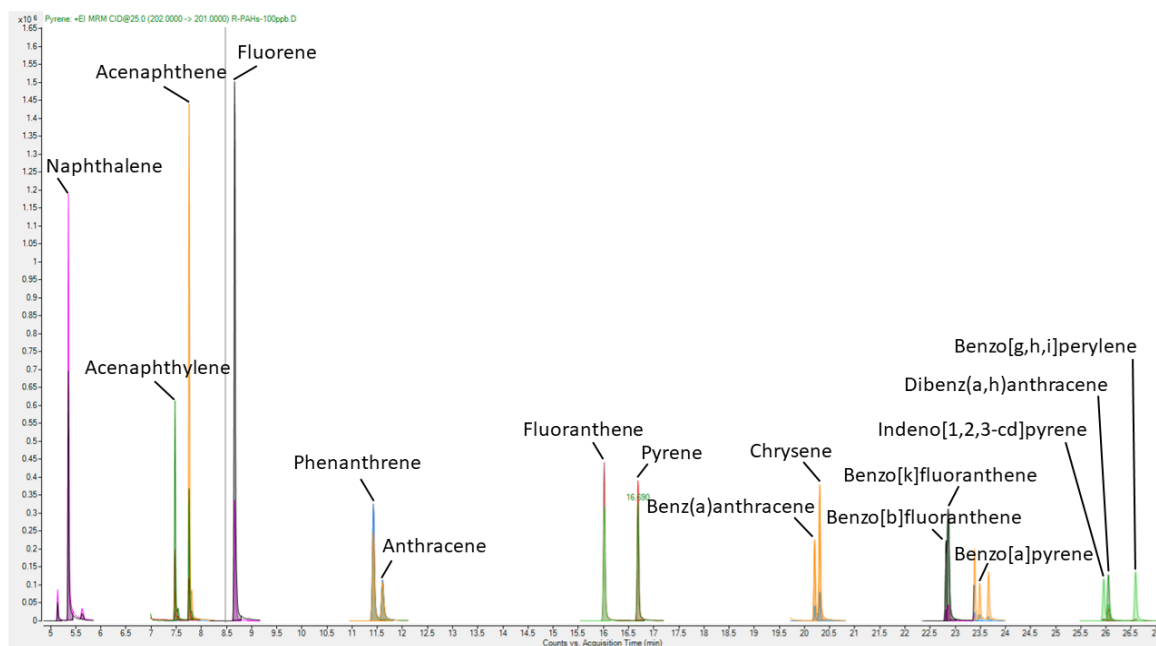

(a)

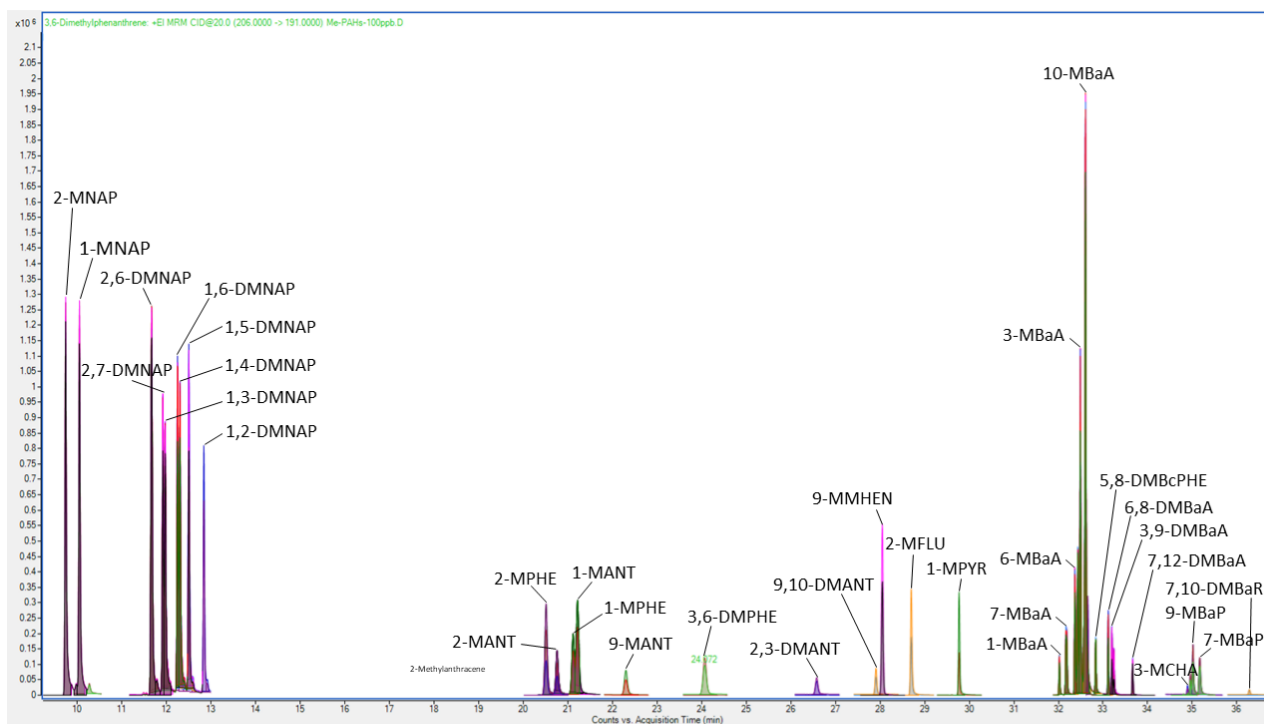

(b)

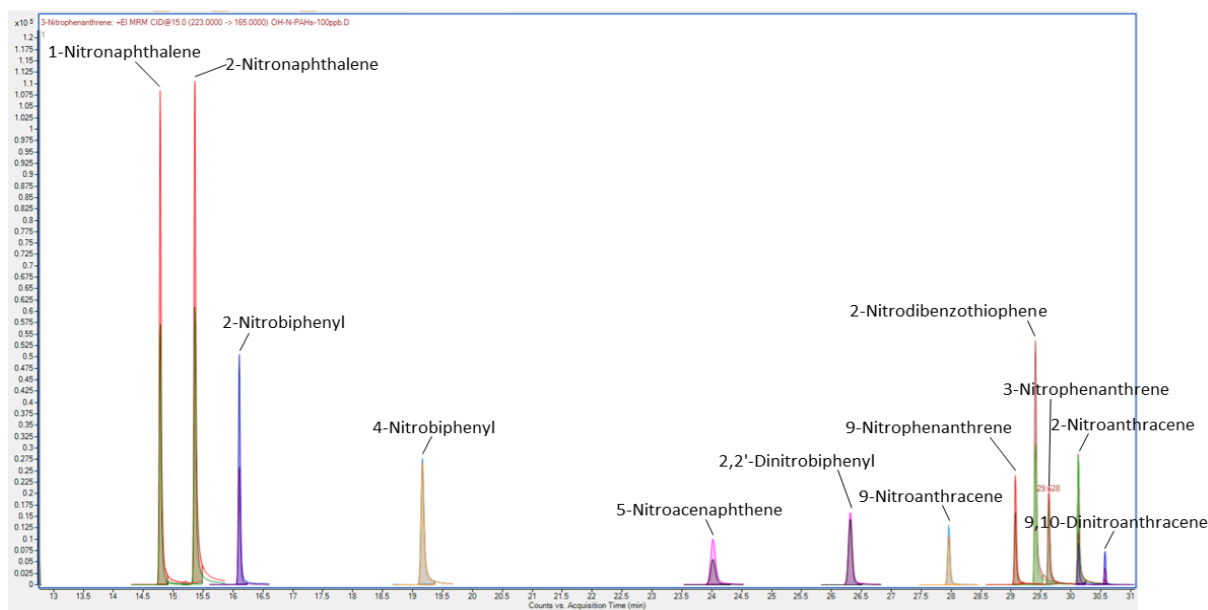

(c)

Figure S1. The representative chromatograph of (a) PAHs, (b) Me-PAHs and (c) NPAH.

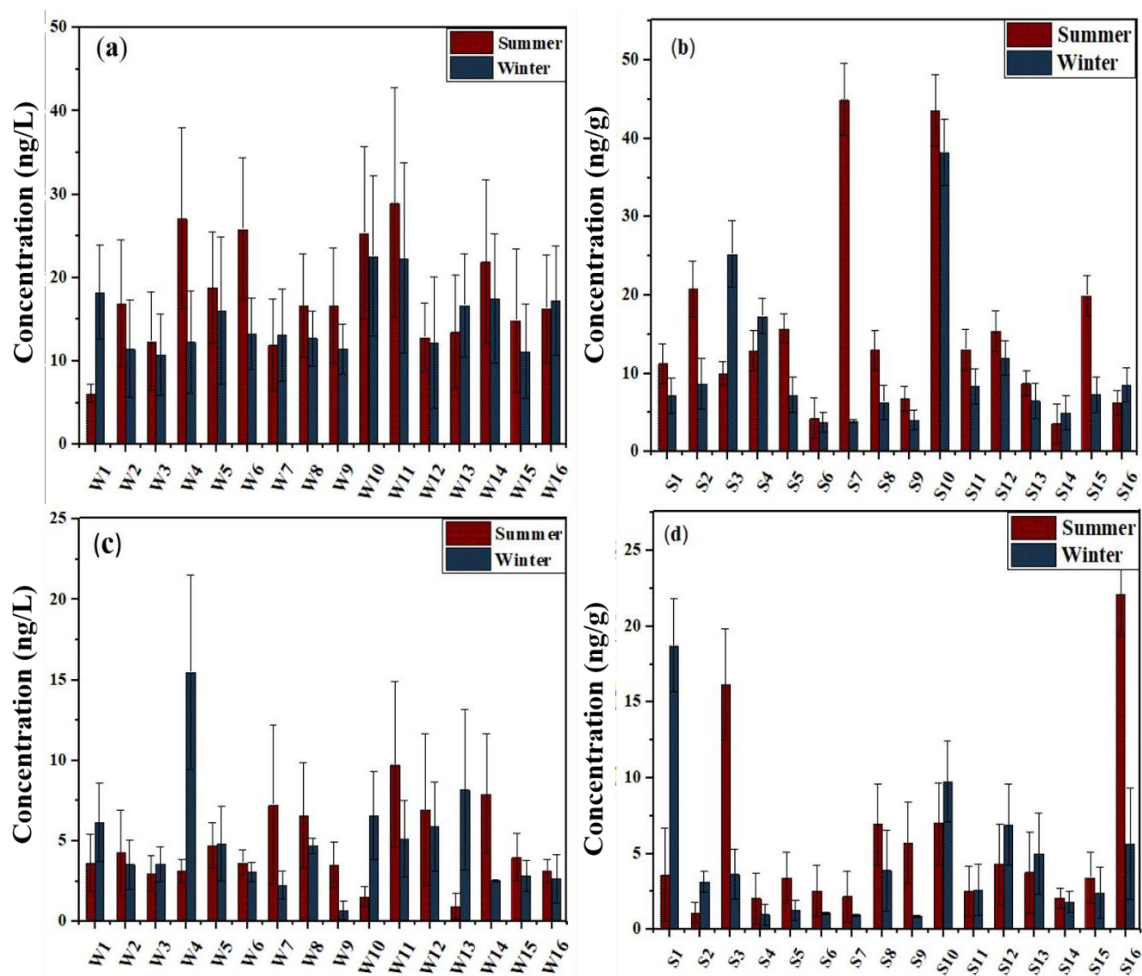

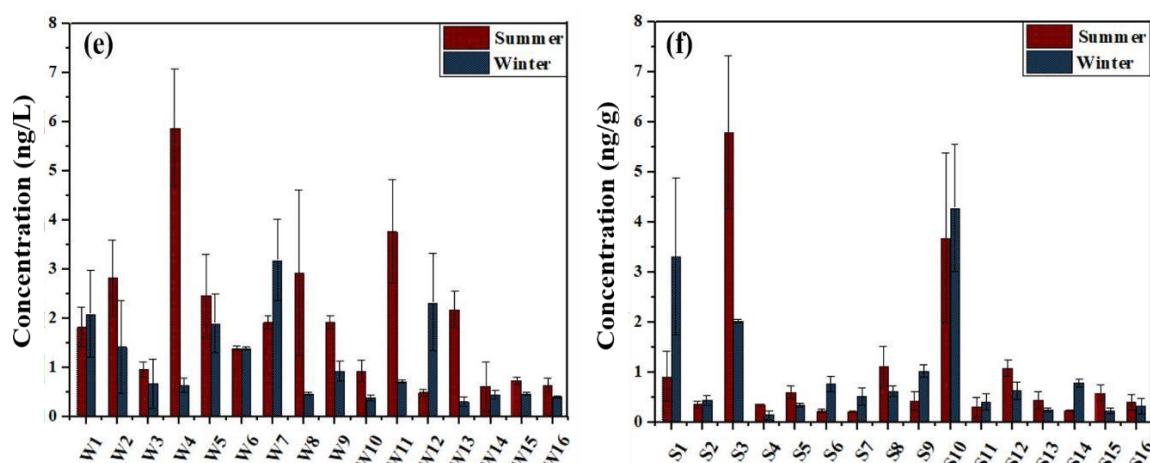

**Figure S2.** Average concentrations of  $\Sigma 16$  PAHs (a) water (ng/L), (b) sediment (ng/g),  $\Sigma 33$  Me-PAHs (c) water (ng/L), (d) sediment (ng/g), and  $\Sigma 12$  NPAHs (e) water (ng/L), (f) sediment (ng/g), at 16 sampling sites during the summer and winter seasons.

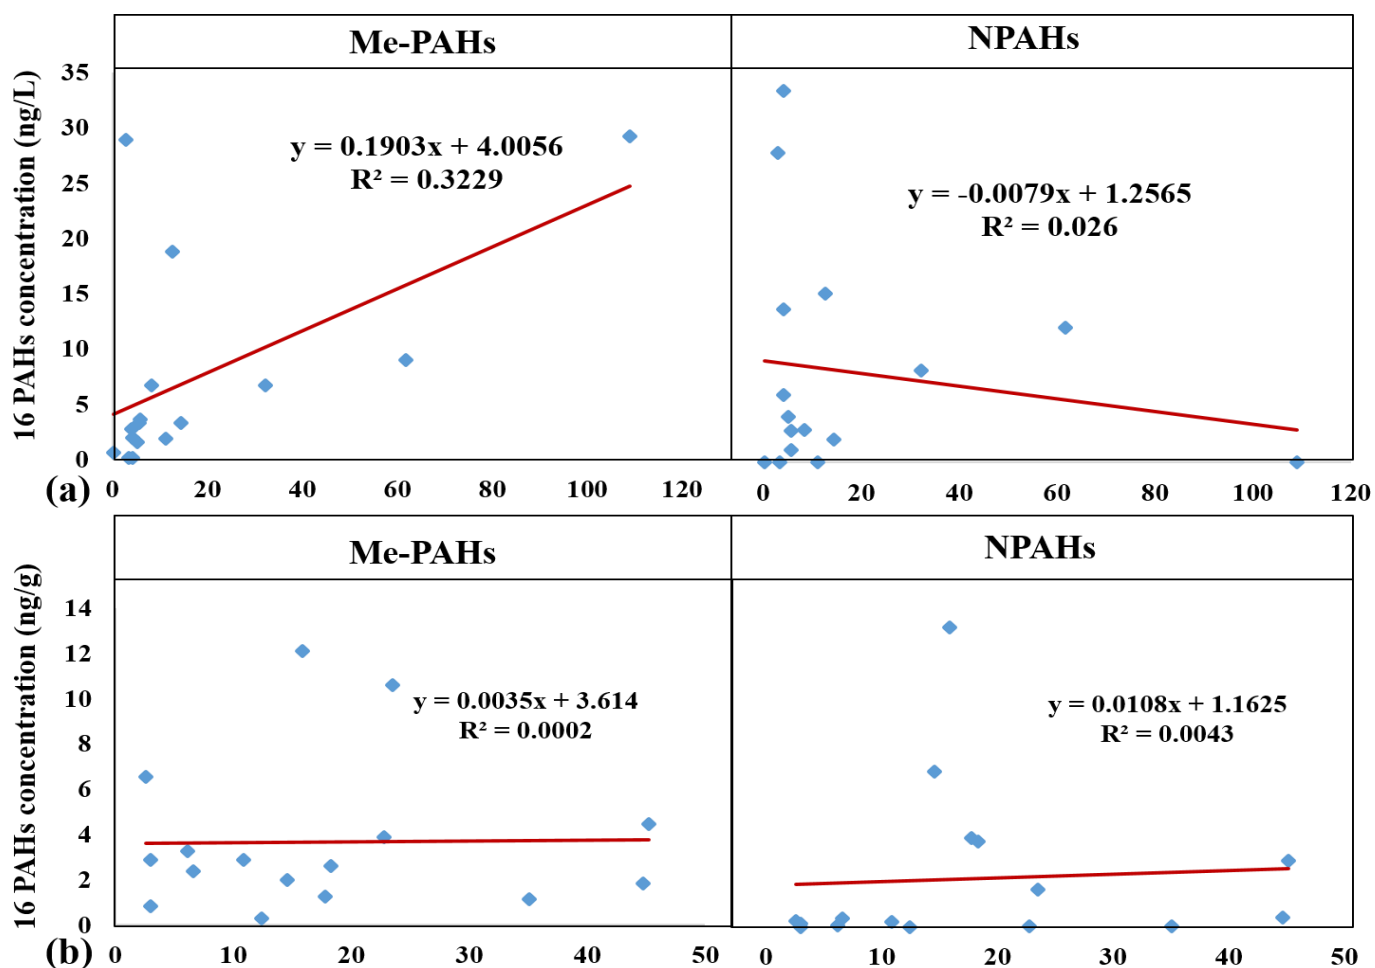

**Figure S3.** Scatterplot of  $\Sigma 16$  PAHs VS  $\Sigma 33$  Me-PAHs and  $\Sigma 14$  NPAHs, (a) water and (b) sediment.
